# Supplementary material for: Investigating the solid state hosting abilities of homo- and hetero-valent [Co7] metallocalix[6]arenes
Source: Royal Society of Chemistry journal article supplement (doi:10.1039/c2dt12229d), 2012-01-01
Supplement: c2dt12229d.pdf [file c2dt12229d.pdf]

*Electronic Supplementary Information*

## Investigating the Solid State Hosting Abilities of Homo- and Heterovalent [Co<sub>7</sub>] Metallocalix[6]arenes

Seán T. Meally,<sup>[a]</sup> Cecelia McDonald,<sup>a</sup> Patrick Kealy,<sup>a</sup> Stephanie M. Taylor,<sup>[b]</sup> Euan K. Brechin<sup>[b]</sup> and Leigh F. Jones<sup>[a]\*</sup>

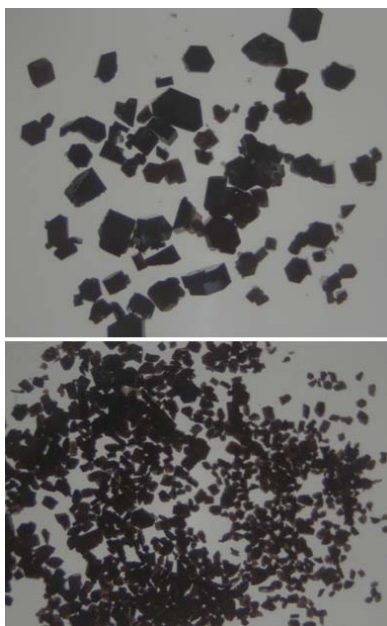

**Fig. S1** Microscopic images of a sample of [Co(II)<sub>7</sub>(OH)<sub>6</sub>(L<sub>1</sub>)<sub>6</sub>](NO<sub>3</sub>)<sub>2</sub>.2MeOH (**2**). This very sample was used for magnetic susceptibility measurements described in this work.

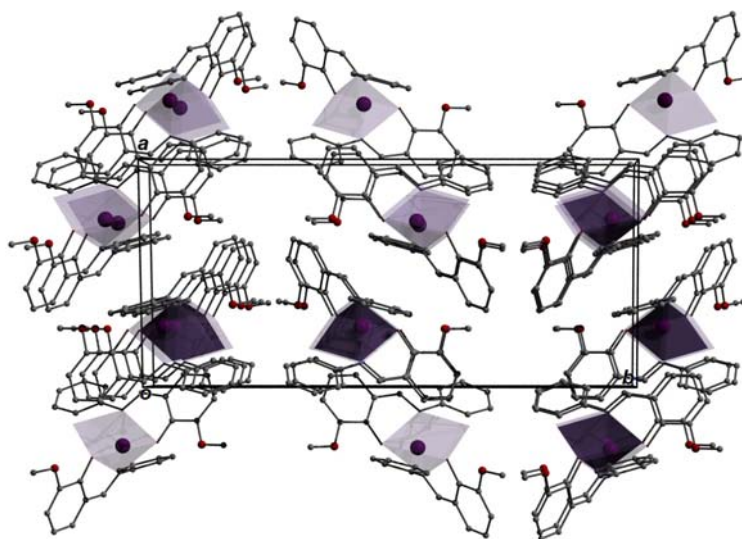

**Fig. S2** Crystal packing shown in polyhedral form showing the 1D superimposable H-bonded chains of [Co(II)(L<sub>2</sub>)<sub>2</sub>] (**5**) propagating along the *c* direction. H atom omitted for clarity.

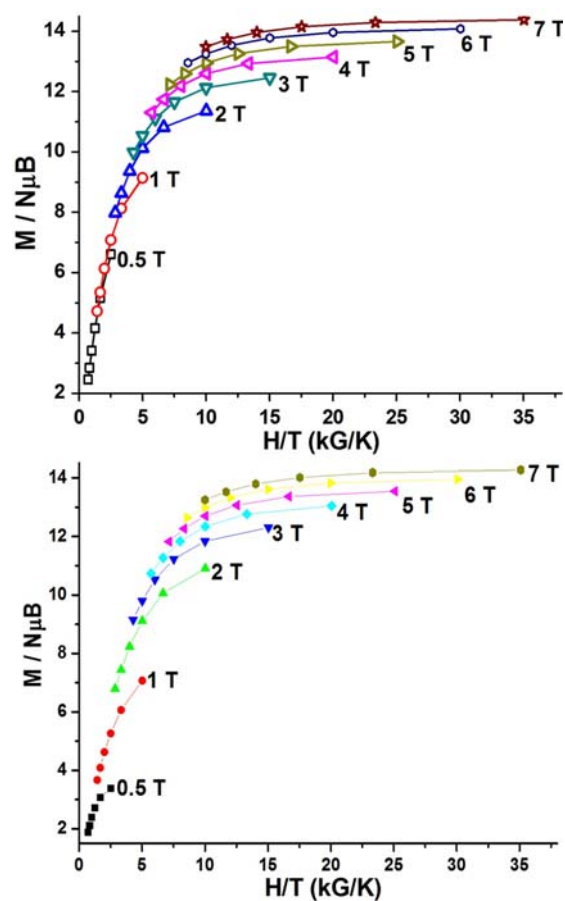

**Fig. S3** Plots of Reduced magnetisation ( $M/N\mu_B$ ) vs. Field ( $H/T$ ) obtained from complexes **2** (top) and **4** (bottom), measured in the 2-7 K temperature range.

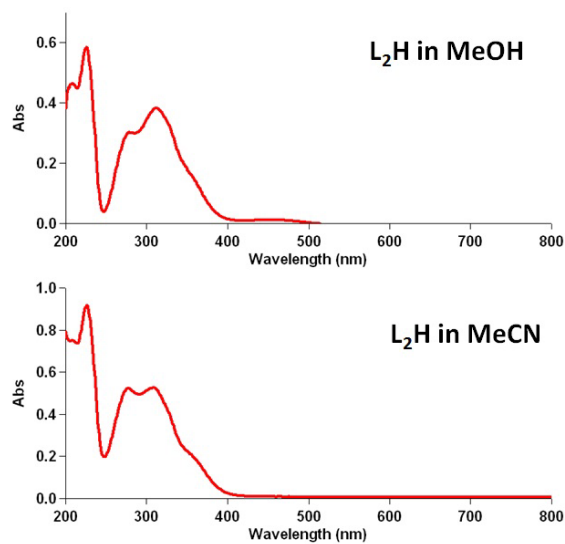

**Fig. S4** UV-vis spectra obtained from MeOH (top) and MeCN (bottom) solutions of  $L_2H$ . For UV-vis data on  $L_1H$  see L. F. Jones et al., *Dalton Trans.*, 2010, 39, 4809–4816.

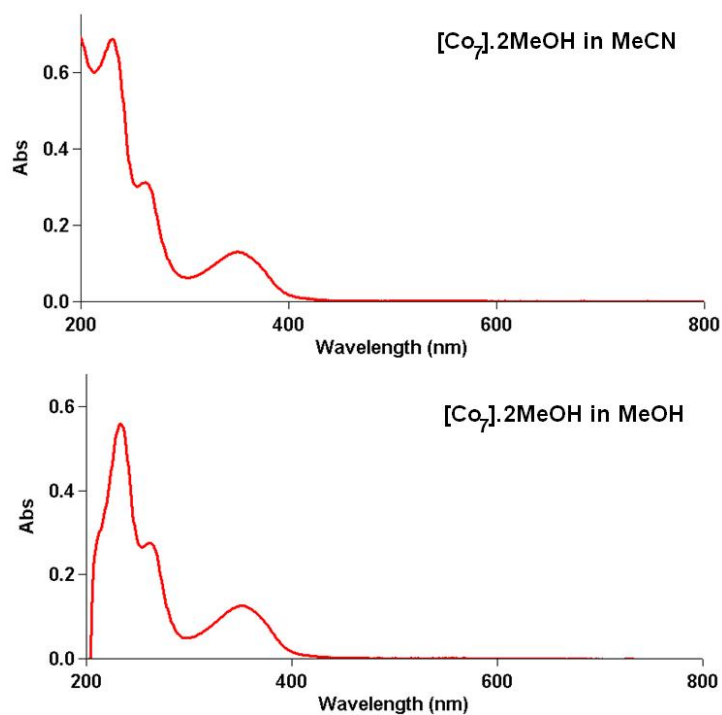

**Fig. S5** UV-vis spectra obtained from MeCN (top) and MeOH (bottom) solutions of  $[\text{Co}_7(\text{OH})_6(\text{L}_1)_6](\text{NO}_3)_2 \cdot 2\text{MeOH}$  (**2**).

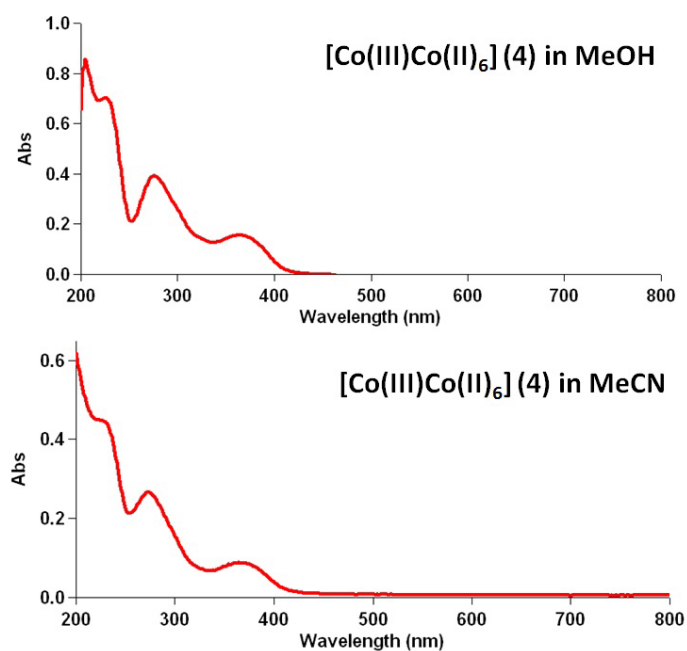

**Fig. S6** UV-vis spectra obtained from MeOH (top) and MeCN (bottom) solutions of  $[(\text{NO}_3)_2\text{Co(III)Co(II)}_6(\text{OH})_6(\text{L}_2)_6](\text{NO}_3) \cdot 3\text{MeCN}$  (**4**).

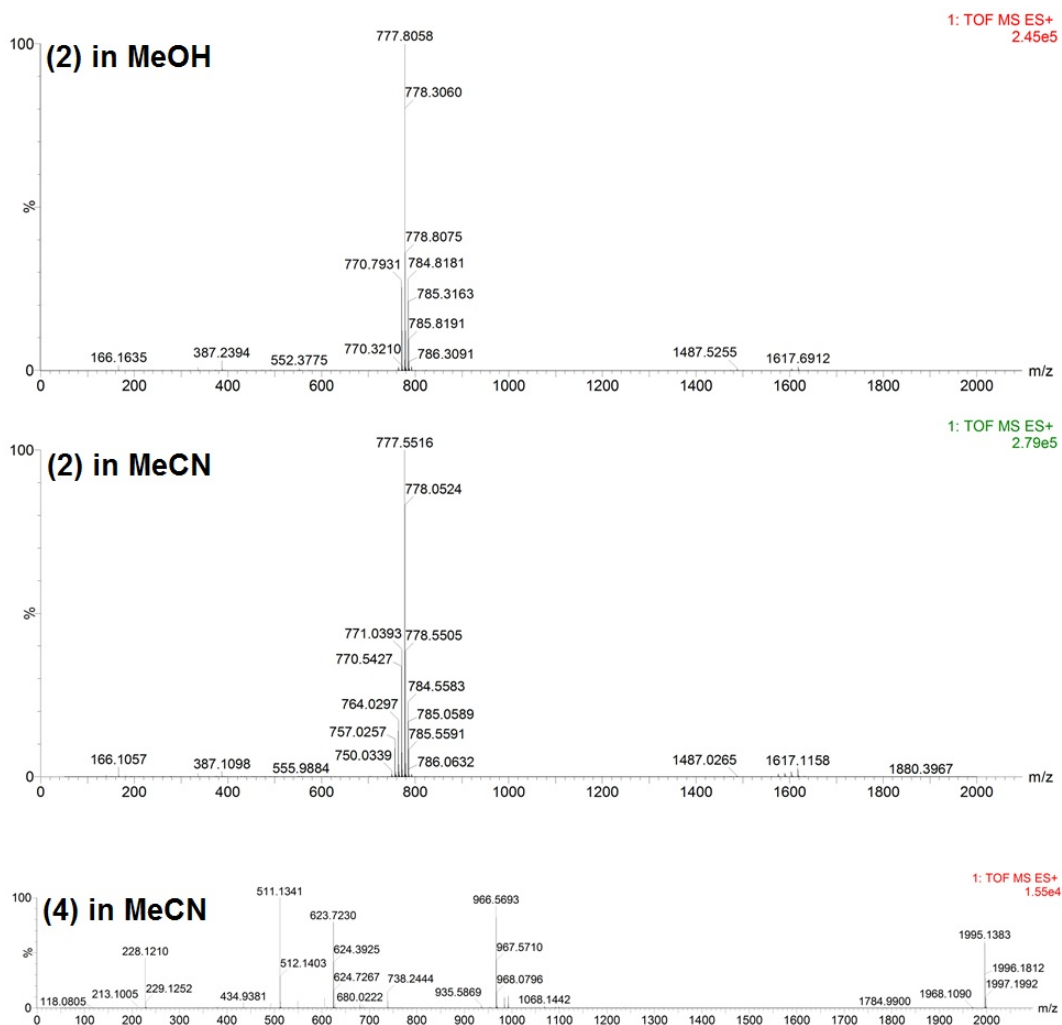

**Fig. S7:** ESI-MS spectra obtained from MeOH and MeCN samples of **2** and **4**. Peak assignments are discussed in the main text.

**Table S1** Crystal data obtained from **5** and **6** (carried out at 296.9 and 150 K respectively).

|                                      | <b>5</b>                                                                      | <b>6</b>                                                                                                                                     |
|--------------------------------------|-------------------------------------------------------------------------------|----------------------------------------------------------------------------------------------------------------------------------------------|
| Formula                              | C <sub>28</sub> H <sub>24</sub> N <sub>2</sub> O <sub>4</sub> Co <sub>1</sub> | C <sub>54</sub> H <sub>54</sub> B <sub>1</sub> Br <sub>6</sub> F <sub>4</sub> N <sub>6</sub> O <sub>12</sub> Co <sub>2</sub> Na <sub>1</sub> |
| Formula Weight                       | 511.42                                                                        | 1686.15                                                                                                                                      |
| Crystal system                       | Monoclinic                                                                    | Monoclinic                                                                                                                                   |
| Space group                          | P2 <sub>1</sub> /c                                                            | C2/c                                                                                                                                         |
| a / Å                                | 11.6622(8)                                                                    | 24.774(5)                                                                                                                                    |
| b / Å                                | 23.9507(13)                                                                   | 15.542(3)                                                                                                                                    |
| c / Å                                | 9.2521(6)                                                                     | 15.416(3)                                                                                                                                    |
| α, β, γ (°)                          | 90, 109.596(7), 90                                                            | 90, 93.61(3), 90                                                                                                                             |
| V / Å <sup>3</sup>                   | 2434.6(3)                                                                     | 5924(2)                                                                                                                                      |
| Z                                    | 4                                                                             | 4                                                                                                                                            |
| D <sub>c</sub> (g cm <sup>-3</sup> ) | 1.395                                                                         | 1.891                                                                                                                                        |
| μ (mm <sup>-1</sup> )                | 0.742                                                                         | 4.693                                                                                                                                        |
| Reflections                          | 4448                                                                          | 5423                                                                                                                                         |
| Unique reflections                   | 3291                                                                          | 4199                                                                                                                                         |
| GOF on F <sup>2</sup>                | 1.139                                                                         | 1.039                                                                                                                                        |
| R <sub>int</sub>                     | 0.0341                                                                        | 0.0298                                                                                                                                       |
| R1 [I > 2σ(I)]                       | 0.0544                                                                        | 0.0302                                                                                                                                       |
| wR2 (all data)                       | 0.1250                                                                        | 0.0713                                                                                                                                       |
| Restraints, Parameters               | 0, 318                                                                        | 0, 395                                                                                                                                       |

**Table S2:** BVS calculations on complexes **1**, **2**, **4** and **6**.

| <b>Complex</b> | <b>Atom label and BVS result</b> |
|----------------|----------------------------------|
| <b>(1)</b>     | <b>Co1 (central)</b>             |
|                | 1.98                             |
|                | <b>Co2 (outer ring)</b>          |
|                | 2.05                             |
| <b>(2)</b>     | <b>Co1 (central)</b>             |
|                | 1.92                             |
|                | <b>Co2 (outer ring)</b>          |
|                | 2.01                             |
| <b>(4)</b>     | <b>Co1 (central)</b>             |
|                | 3.37                             |
|                | <b>Co2 (outer ring)</b>          |
|                | 2.06                             |
|                | <b>Co3 (outer ring)</b>          |
|                | 1.99                             |
|                | <b>Co4 (outer ring)</b>          |
|                | 1.98                             |
| <b>(6)</b>     | <b>Co1</b>                       |
|                | 3.3                              |

#### **X-ray diffraction details on the collection of 1-6**

The structures of **1-6** were collected on an Xcalibur S single crystal diffractometer (Oxford Diffraction) using an enhanced Mo source. Each data reduction was carried out on the CrysAlisPro software package. The structures were solved by direct methods (SHELXS-97)<sup>1</sup> and refined by full matrix least squares using SHELXL-97.<sup>2</sup> SHELX operations were automated using the OSCAIL software package.<sup>3</sup> All hydrogen atoms were placed in calculated positions. The non hydrogen atoms were refined anisotropic except for the disordered guest MeOH molecules in complex **2** which were left isotropic. DFIX and restraints were required on the disordered MeOH guest solvent molecules in **2** as a result of high isotropic thermal parameters upon refinement.

1. G. M. Sheldrick, *Acta. Crystallogr., Sect. A: Found. Crystallogr.*, 1990, **A46**, 467.

2. G. M. Sheldrick, SHELXL-97, A computer programme for crystal structure determination, University of Gottingen, 1997.

3. P. McArdle, P. Daly and D. Cunningham, *J. Appl. Crystallogr.*, 2002, **35**, 378.
